# Supplementary material
Source: publisher figshare collection journal article supplement (https://frontiersin.figshare.com/ndownloader/files/30823630)
Supplement: Supplementary file [file 30823630]

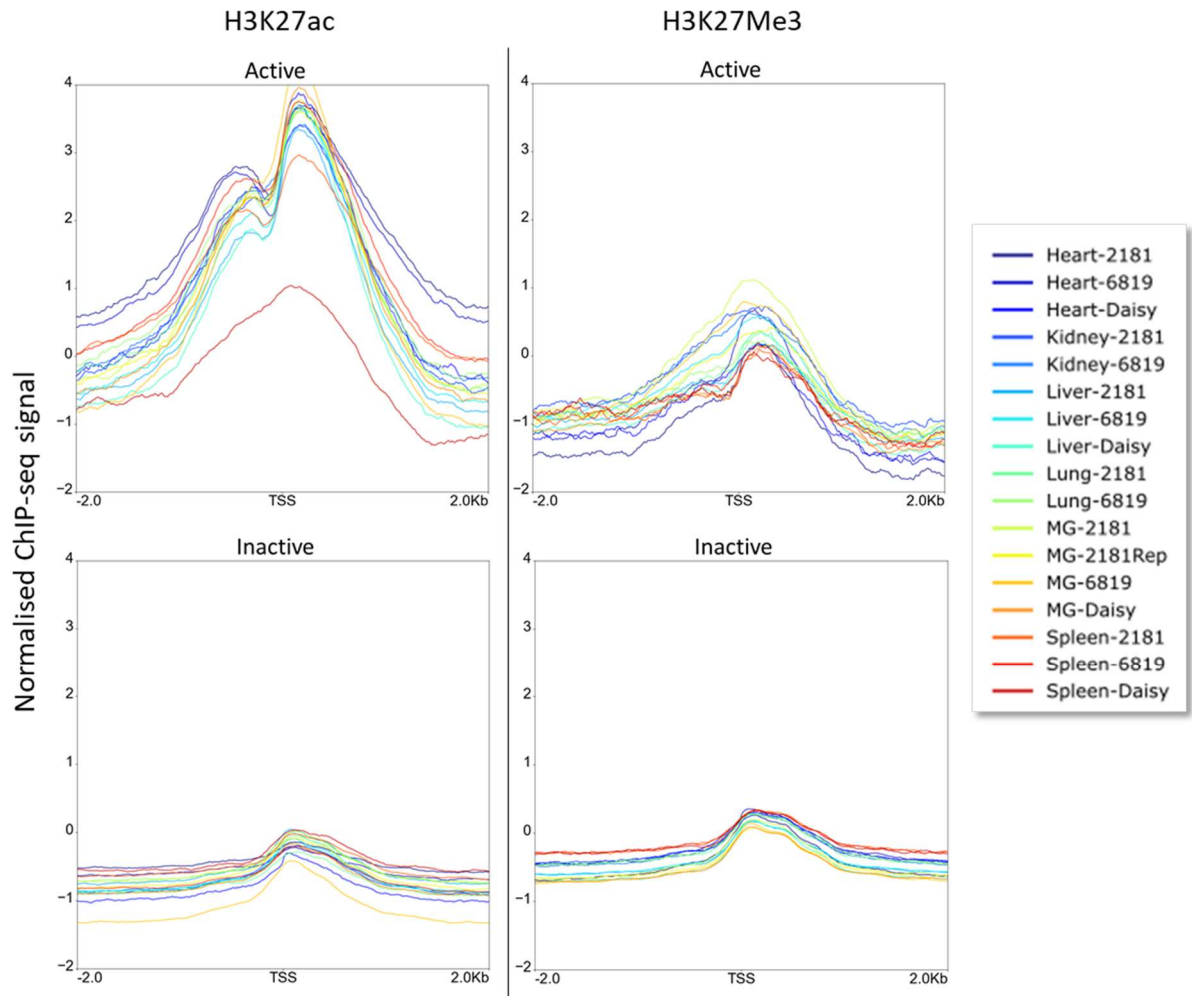

**Supplementary Figure 2. Comparison of profiles of H3K27Me3 and H3K27ac at active and inactive genes.** Normalised ChIP-seq signal above input signal of the active (H3K27ac) and inactive (H3K27Me3) histone modifications within 2kb of transcription start sites (TSS) for active and inactive genes in all 6 tissues.
